# Supplementary material
Source: PubMed Central journal article supplement (PMC5096647)

Figure S1.

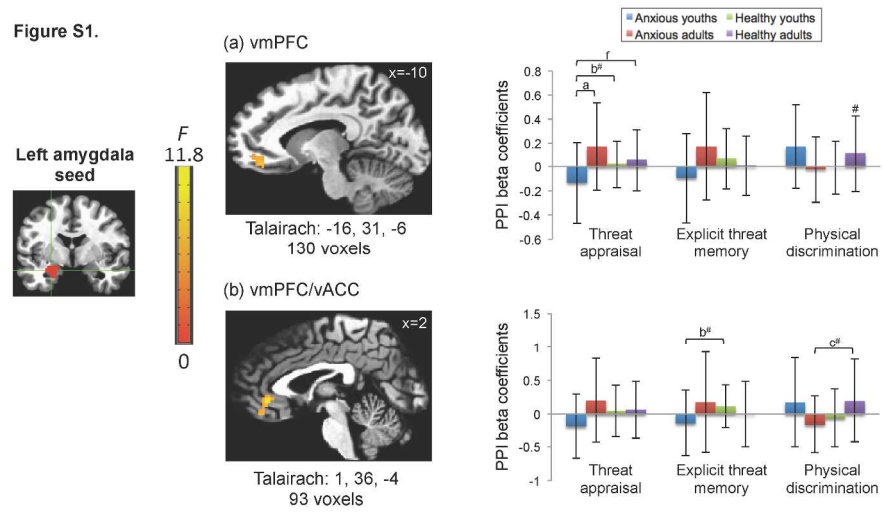

Figure S1

Supplement: NIHMS752621-supplement-Supp_Fig_S1.pdf [file NIHMS752621-supplement-Supp_Fig_S1.pdf]
